# Supplementary material for: Molecular insights into the binding of carnosine and anserine to human serum carnosinase 1 (CN1)
Source: PeerJ journal article supplement (doi:10.7717/peerj-pchem.25), 2022-10-20
Supplement: CN1_SI_PP3_peerJ-revision-14-8-22.pdf [file CN1_SI_PP3_peerJ-revision-14-8-22.pdf]

## Supporting Information

### Molecular insights into the binding of carnosine and anserine to human serum carnosinase 1 (CN1)

Borvornwat Toviwek<sup>1</sup>, Koonawootrittriron S<sup>2</sup>, Suwanasopee T<sup>2</sup>, and Prapasiri Pongprayoon<sup>1,2\*</sup>

**Table S1.** Gold docking scores for anserine and carnosine to CN1.

| Ligand    | Fitness Score Chain A | Fitness Score Chain B |
|-----------|-----------------------|-----------------------|
| Anserine  | 59.59                 | 86.68                 |
| Carnosine | 56.61                 | 84.45                 |

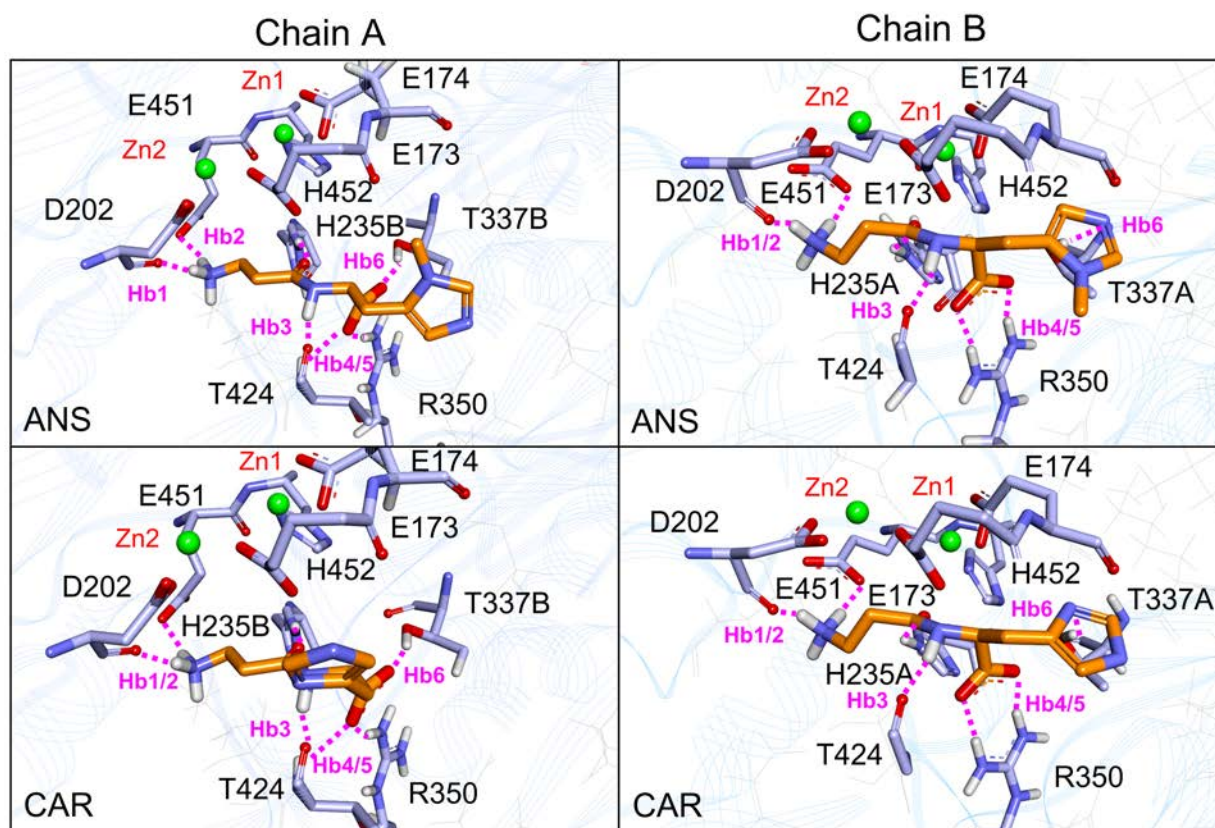

**Figure S1.** Binding mode of anserine and carnosine to CN1 from docking simulations.

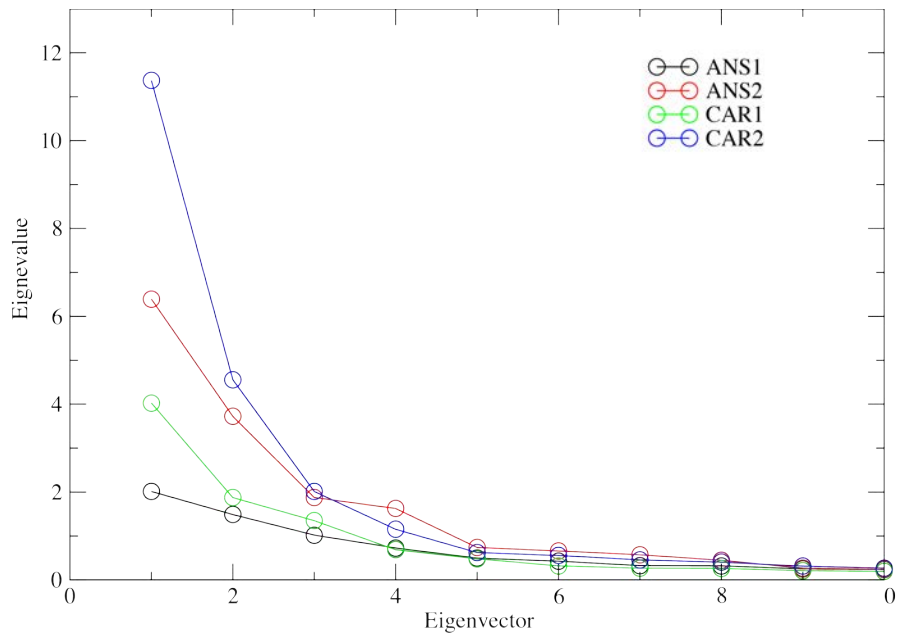

**Figure S2.** Eigenvalues of all systems

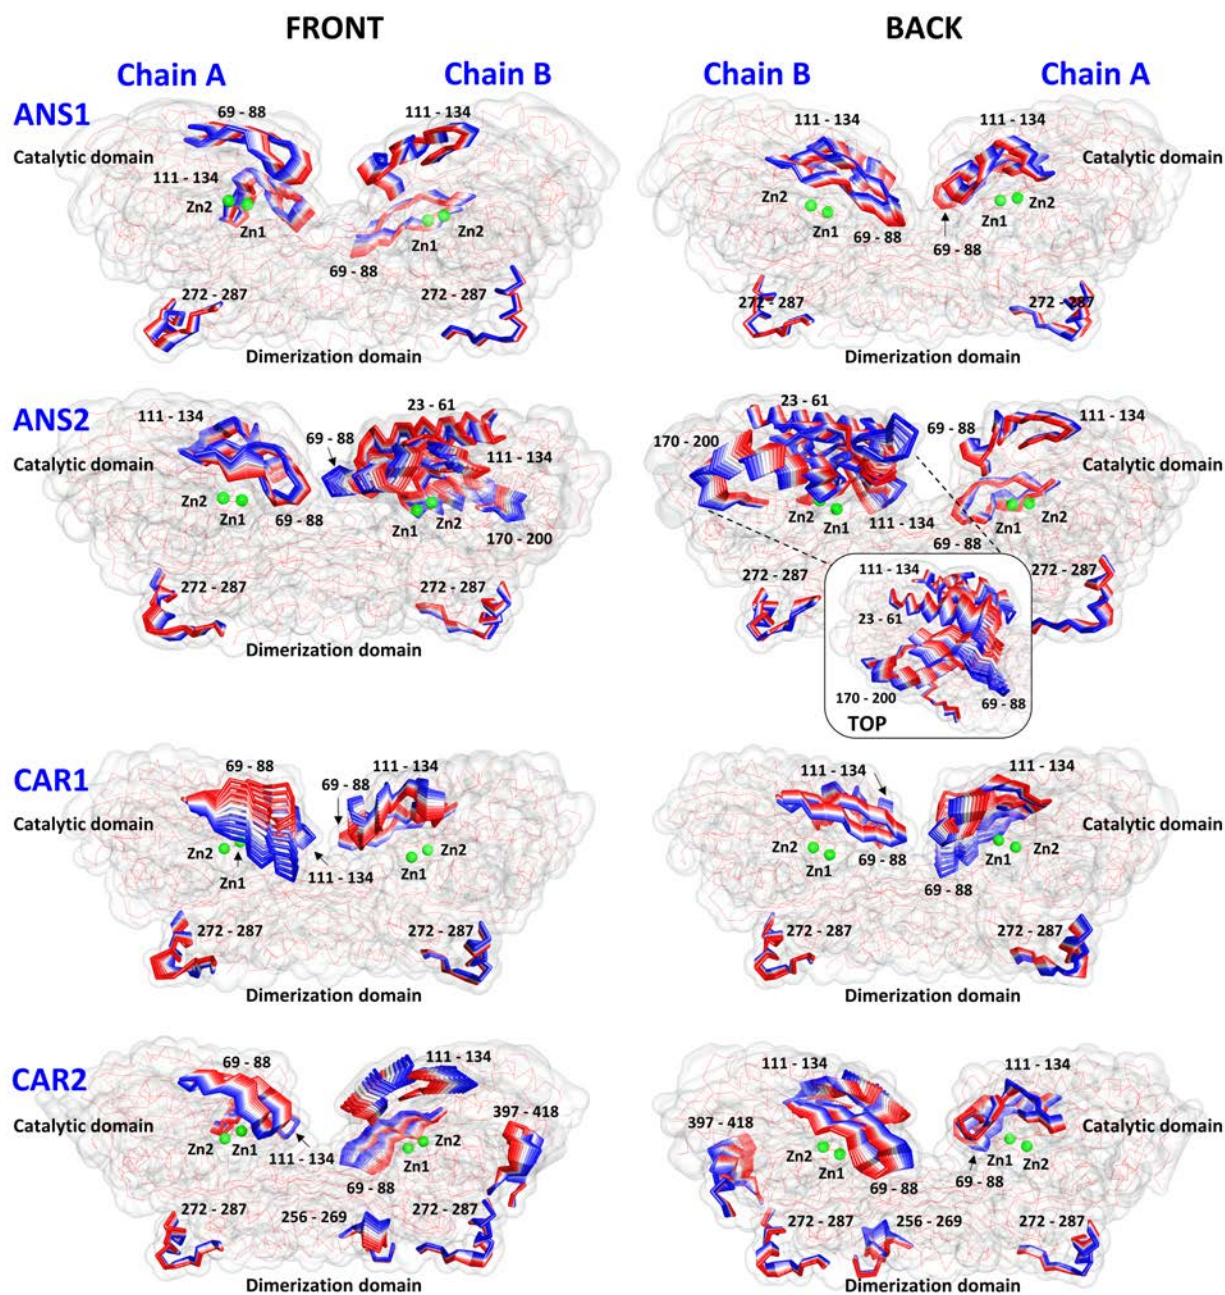

**Figure S3.** Principal Component analysis (PCA) calculated from the first principal component of all systems. Only highly mobile regions are shown in RWB format.

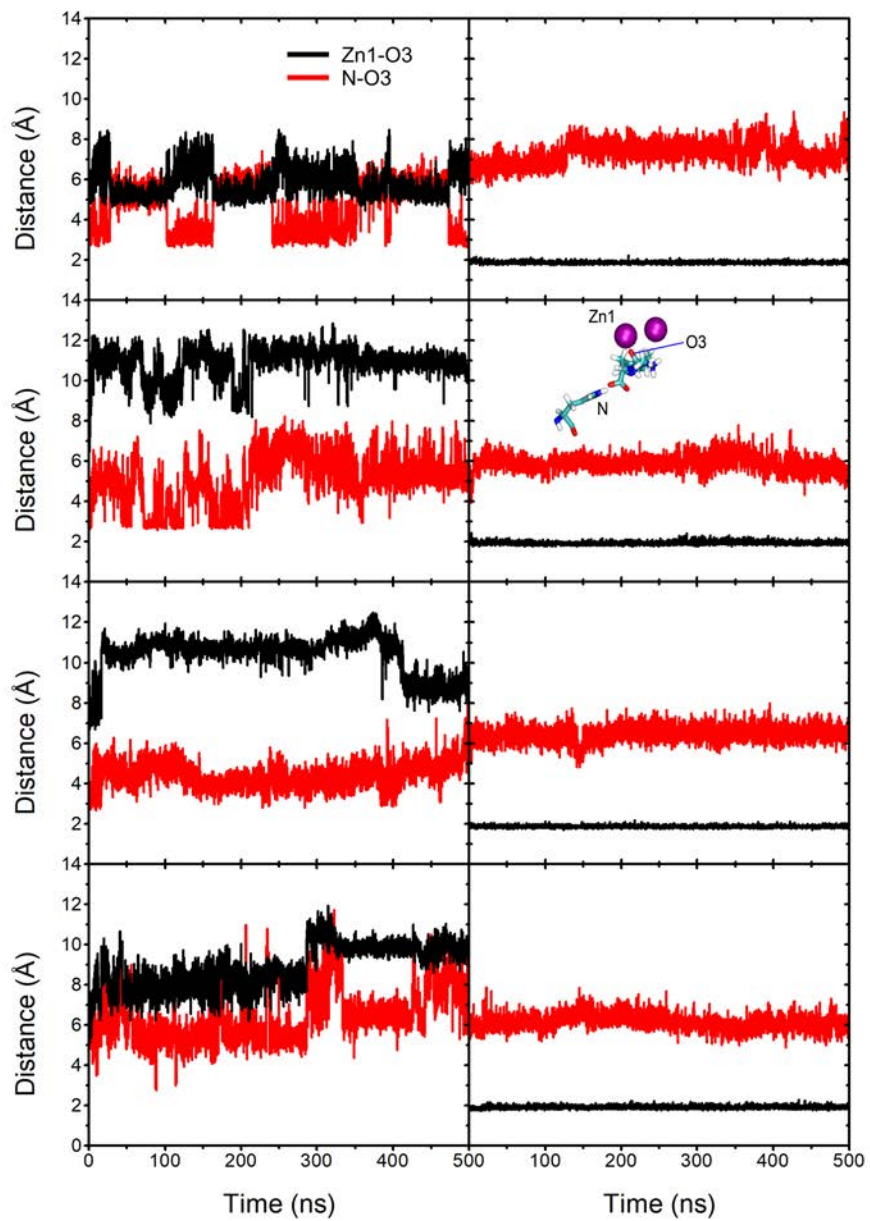

**Figure S4.** Distances of Zn1-O3 (black) and N-O3 (red). N is a nitrogen atom on histidine ring (H235) and O3 is a carbonyl oxygen (O3) on ligand in all systems.



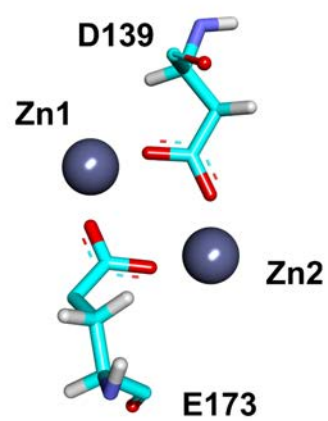

**Figure S5.** Bridge-like structure of two Zinc ions and D139 and E173

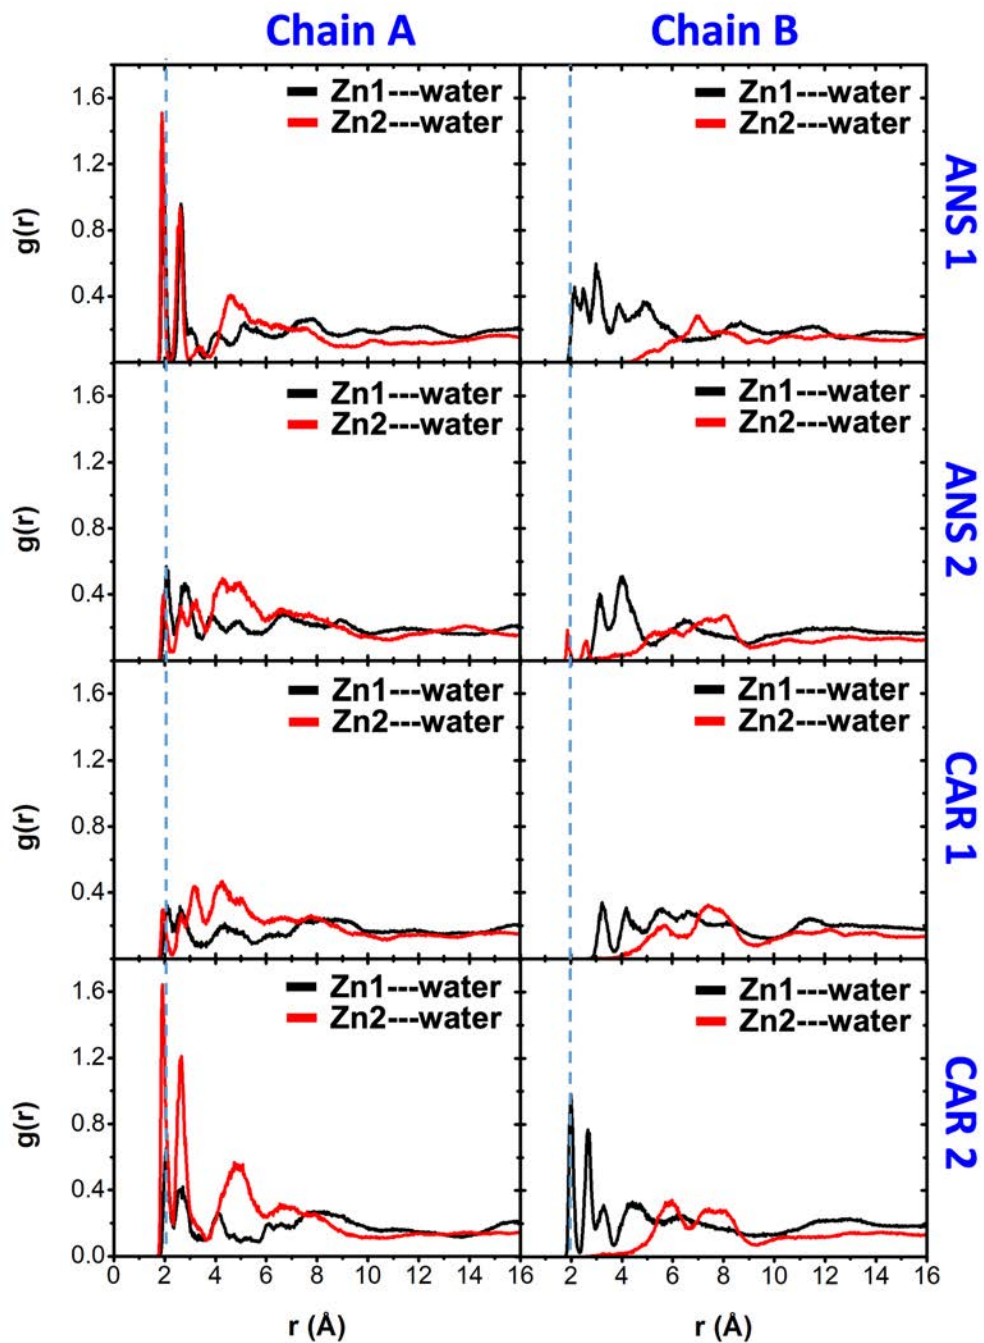

**Figure S6.** Radial Distribution Function of Zn1 and Zn2 in all systems. The dashed line represents the Zn-O bond length reported in a previous work [1].

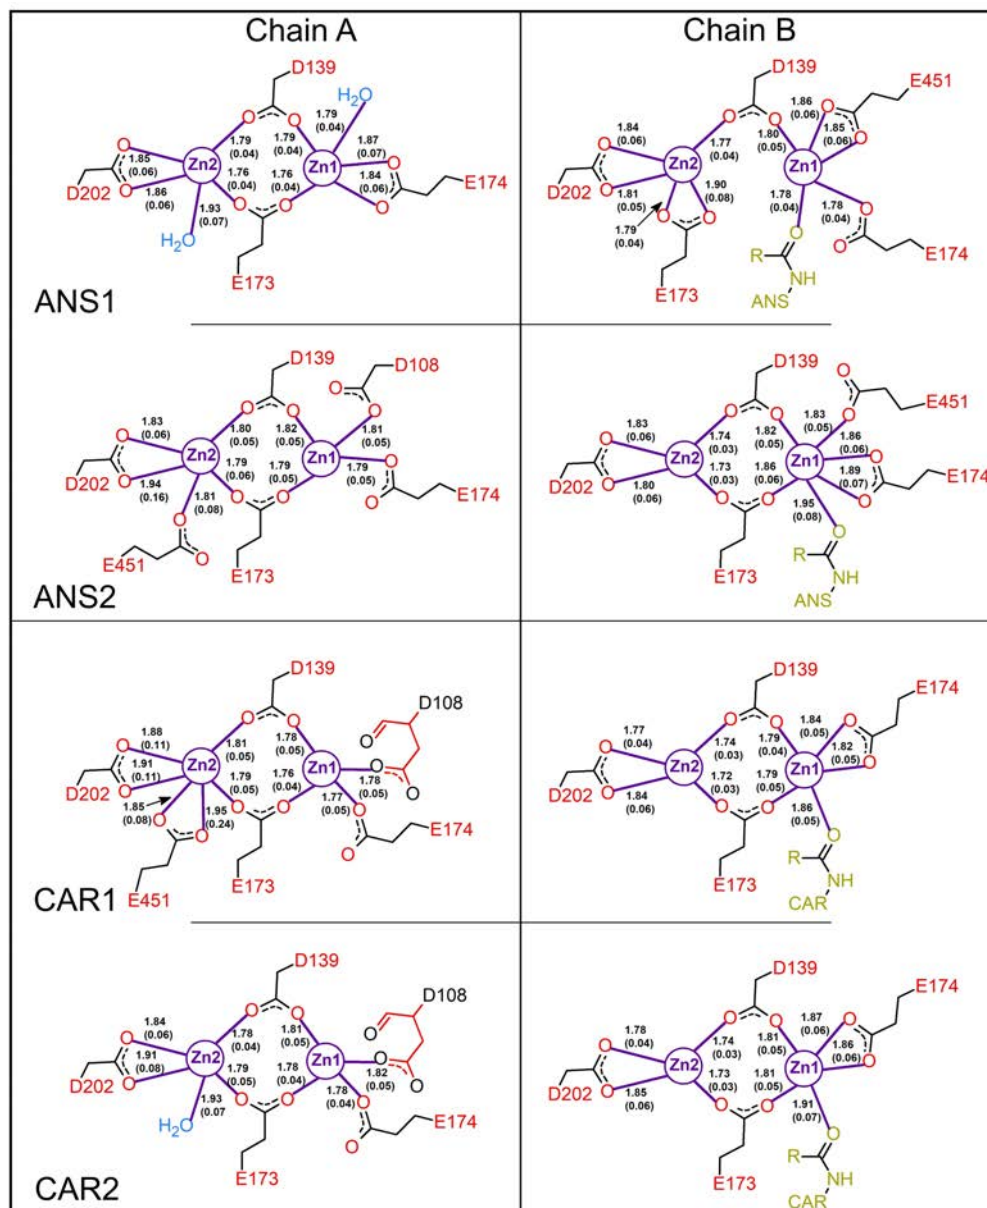

**Figure S7.**  $\text{Zn}^{2+}$  environments (first shell (distance  $\leq 0.2$  nm) (Ataie et al. 2008; Tamames et al. 2007)) inside the pocket in all systems. The average distances between  $\text{Zn}^{2+}$  and nitrogen or oxygen atoms are shown with standard deviation in a bracket. Such average distances are computed using the data after 250 ns.

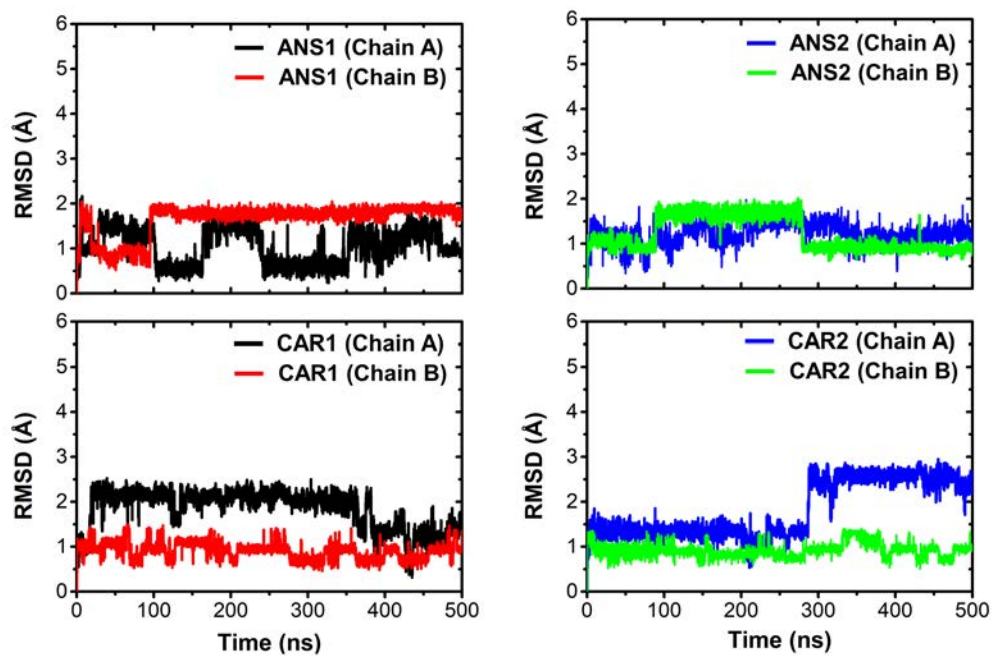

Figure S8. Ligand RMSDs of all systems.

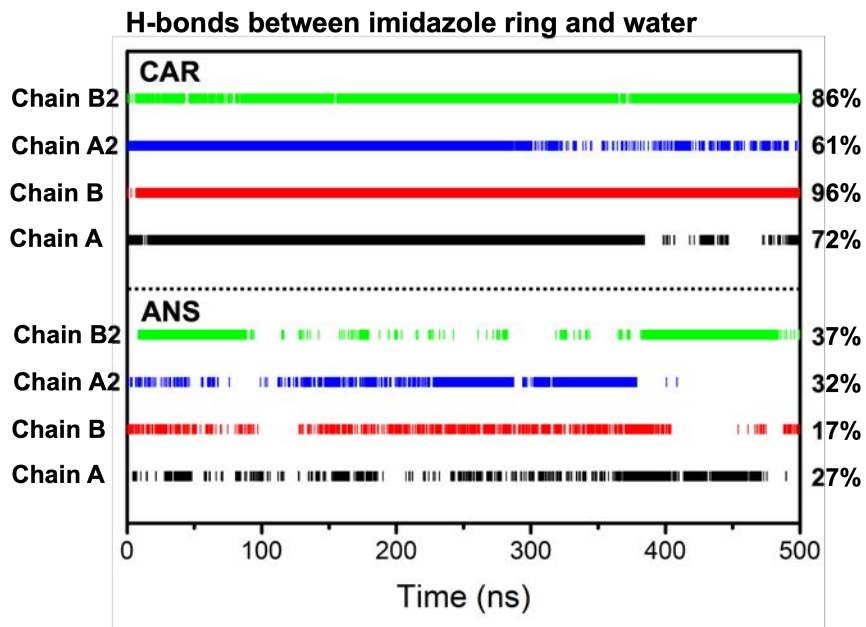

Figure S9. Average hydrogen bonds between imidazole moiety and water



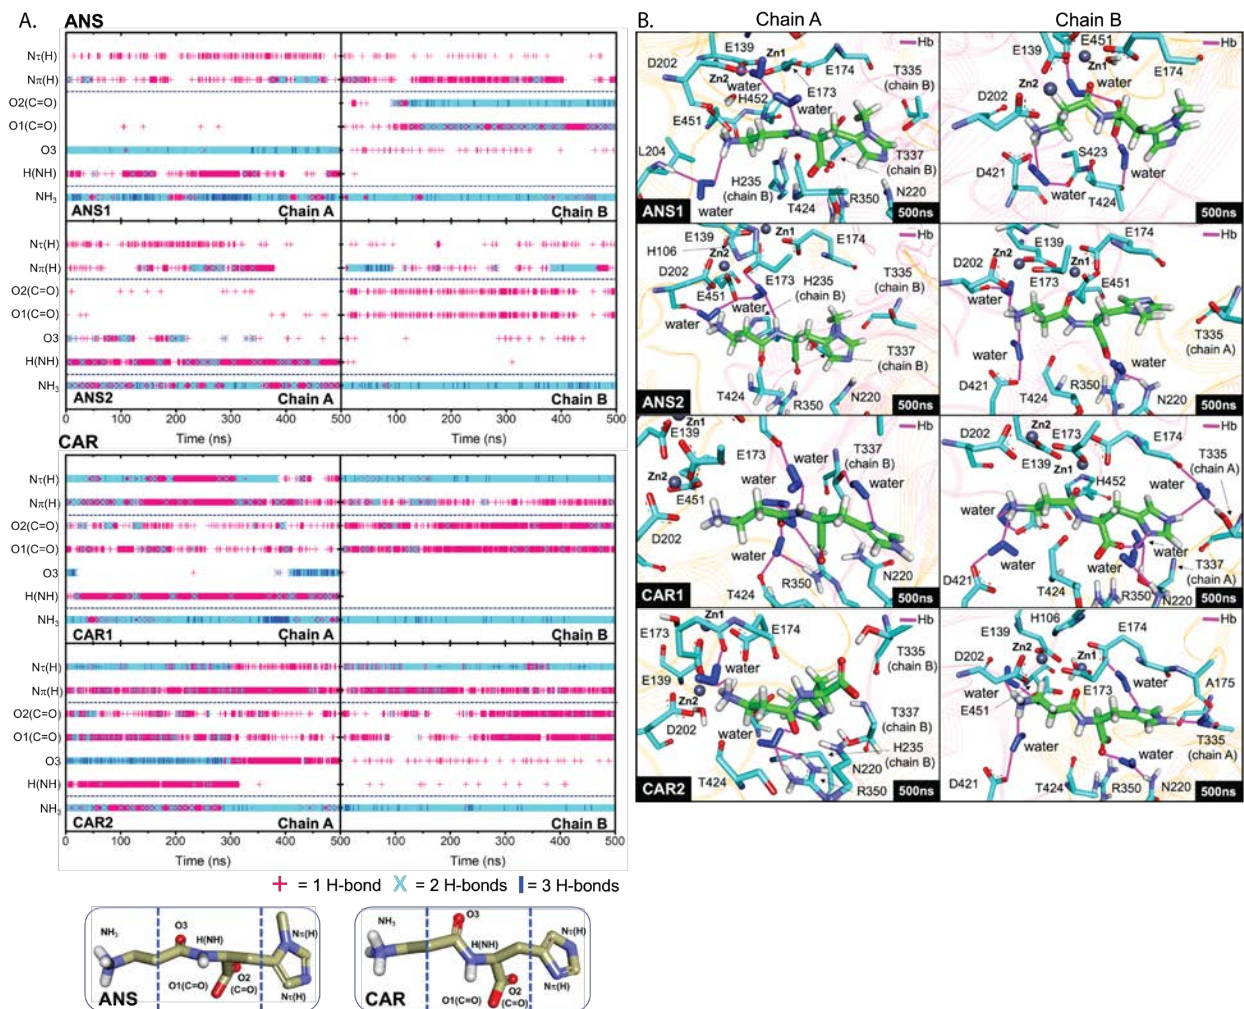

**Figure S10** (A) Hydrogen bonds between polar atoms on a ligand and water. The locations of each atom are shown at the bottom. (B) Orientations of ligand inside a pocket and cavity-lining residues in all systems. Key water molecules that can bridge residue and ligand are displayed in blue.

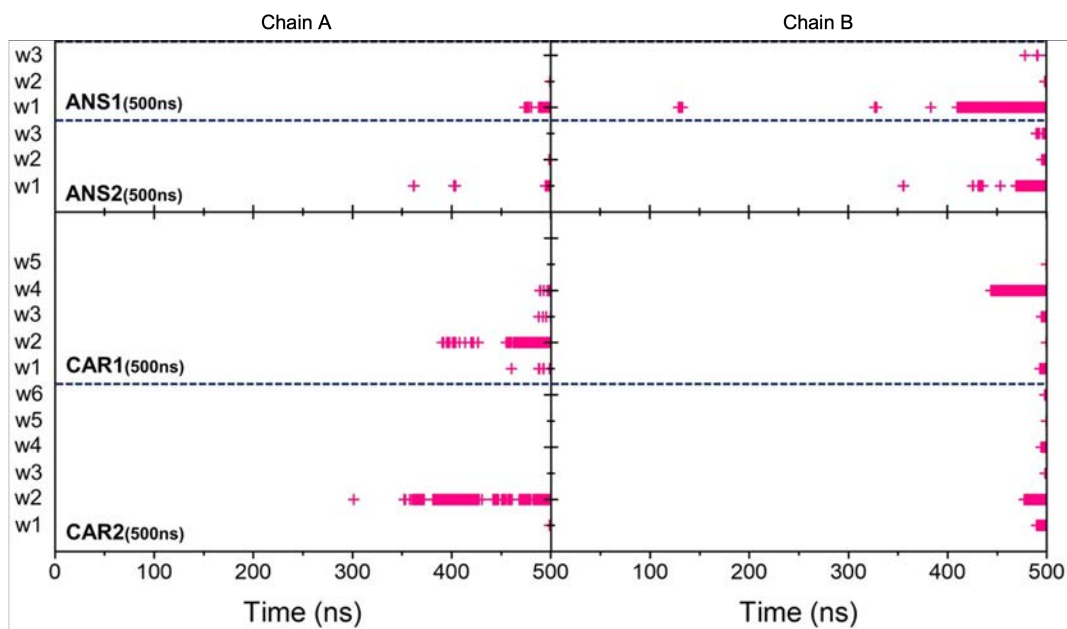

**Figure S11** Hydrogen bonds between residues and water molecules that form hydrogen bonds with ligand from chains A and B. Water molecules (w1-w6) forming hydrogen bonds with each ligand at 500ns are used for residue-bridging hydrogen bonds.
